# Supplementary material
Source: MDPI journal article supplement (https://www.mdpi.com/2073-4441/14/6/890)
Supplement: s1 [file s1]

**Table S1.** Average of metal concentrations (ppm) and total organic matter (%) in bottom sediment of Lake Qaroun in first year.

| S. L. | OM    | Mn   | Sb   | As    | Cd   | Cr    | Cu    | Fe    | Pb    | Se   | Zn    | Ni    | Co    | Mo   | Li    | Mg   | Al    | Ba   | Zr    | P    | Ga   | Hf    |
|-------|-------|------|------|-------|------|-------|-------|-------|-------|------|-------|-------|-------|------|-------|------|-------|------|-------|------|------|-------|
| 1     | 14.23 | 258  | 4.53 | 6.97  | 6.04 | 44.8  | 32.5  | 12146 | 11.68 | ND   | 30.51 | 15.56 | 11.66 | 1.46 | 28.01 | 992  | 20908 | 265  | 11263 | 2676 | 145  | 14.26 |
| 2     | 16.29 | 247  | 6.04 | 6.2   | 5.88 | 44.22 | 30.22 | 11419 | 10.27 | ND   | 27.59 | 15.46 | 12.12 | 0.70 | 29.35 | 992  | 19790 | 272  | 10534 | 2582 | 165  | 13.23 |
| 3     | 12.33 | 166  | 7.74 | 12.32 | 4.8  | 34.02 | 22.06 | 8667  | 1.76  | 2.26 | 20.44 | 12.82 | 9.07  | 0.91 | 17.7  | 965  | 15753 | 261  | 12032 | 2476 | 126  | 11.60 |
| 4     | 12.24 | 331  | 8.56 | 3.37  | 5.05 | 36.1  | 35.6  | 11342 | 10.6  | 0.01 | 36.8  | 23.1  | 15.3  | 2.32 | 27.3  | 1075 | 16890 | 184  | 10103 | 2820 | 178  | 10.72 |
| 5     | 11.80 | 716  | 4.32 | 20.5  | 5.61 | 49.1  | 16.9  | 7996  | 5.95  | 0.43 | 14.2  | 12.4  | 11.2  | 1.57 | 17.2  | 987  | 17002 | 245  | 11850 | 2699 | 196  | 11.0  |
| 6     | 4.11  | 509  | 11.3 | 5.95  | 5.15 | 60.0  | 23.1  | 8921  | 4.76  | 0.02 | 11.3  | 10.8  | 17.3  | 1.01 | 14.7  | 1241 | 12855 | 280  | 11907 | 2925 | 290  | 11.9  |
| 7     | 3.23  | 515  | 5.14 | 11.00 | 4.02 | 19.46 | 13.1  | 5503  | 1.36  | 2.53 | 11.95 | 6.7   | 7.73  | 1.02 | 15.39 | 865  | 10652 | 311  | 5302  | 2645 | 95.9 | 6.08  |
| 8     | 3.04  | 217  | 6.95 | 24.6  | 5.76 | 20.1  | 10.4  | 5863  | 0.03  | 6.03 | 4.4   | 3.1   | 7.35  | 0.98 | 21.0  | 685  | 10001 | 102  | 7688  | 3696 | 247  | 5.69  |
| 9     | 17.86 | 383  | 6.06 | 5.55  | 7.18 | 62.3  | 52.89 | 16446 | 18.12 | ND   | 58.42 | 28.01 | 16.92 | 2.09 | 30.66 | 999  | 21500 | 208  | 12684 | 2784 | 192  | 18.5  |
| 10    | 5.75  | 298  | 6.86 | 17.3  | 4.45 | 36.4  | 20.8  | 7288  | 3.05  | 0.09 | 21.0  | 15.7  | 16.0  | 3.64 | 17.6  | 1174 | 10400 | 113  | 5844  | 2825 | 177  | 7.06  |
| 11    | 8.13  | 340  | 6.06 | 14.7  | 5.04 | 38.0  | 25.8  | 9778  | 4.15  | 0.01 | 11.7  | 16.5  | 9.67  | 0.63 | 24.6  | 1043 | 16052 | 205  | 7262  | 3066 | 124  | 9.88  |
| 12    | 2.61  | 321  | 2.66 | 13.9  | 4.95 | 29.8  | 18.6  | 7866  | 8.85  | 3.09 | 13.1  | 14.3  | 10.3  | 0.30 | 19.1  | 1210 | 17006 | 242  | 7009  | 2802 | 89.7 | 9.45  |
| 13    | 9.21  | 381  | 4.78 | 10.7  | 6.34 | 50.0  | 36.7  | 17016 | 2.51  | 0.04 | 23.0  | 20.0  | 17.1  | 0.90 | 22.9  | 1046 | 21743 | 295  | 8234  | 3090 | 136  | 13.9  |
| 14    | 3.30  | 257  | 6.11 | 14.19 | 4.83 | 23.92 | 14.1  | 6599  | 5.2   | 0.61 | 3.79  | 7.68  | 8.36  | 1.1  | 22.46 | 1107 | 11742 | 172  | 7237  | 2997 | 144  | 8.15  |
| 15    | 3.80  | 463  | 4.58 | 23.7  | 4.32 | 26.3  | 17.2  | 6094  | 2.4   | 0.96 | 12.9  | 10.6  | 10.7  | 0.65 | 15.4  | 801  | 10993 | 198  | 5956  | 3213 | 121  | 7.97  |
| 16    | 2.31  | 116  | 1.22 | 26.5  | 3.23 | 9.38  | 6.09  | 2519  | 0.01  | 4.12 | 8.04  | 5.85  | 2.05  | 1.33 | 15.1  | 790  | 3400  | 60.0 | 2063  | 3209 | 44.1 | 4.55  |
| 17    | 1.17  | 43.7 | 0.01 | 25.6  | 3.89 | 6.07  | 3.01  | 2251  | ND    | 7.85 | 0.04  | 3.01  | 2.52  | 0.06 | 16.6  | 968  | 6632  | 98.5 | 4688  | 2769 | 28.1 | 3.92  |
| 18    | 2.61  | 80.4 | 4.97 | 19.9  | 4.15 | 12.75 | 7.49  | 4445  | 3.91  | 4.27 | ND    | 2.26  | 2.61  | 0.13 | 19.16 | 1162 | 11636 | 207  | 5780  | 3191 | 55.8 | 5.99  |
| 19    | 0.75  | 109  | 4.89 | 23.3  | 4.43 | 13.1  | 7.02  | 3172  | 0.16  | 5.98 | 0.06  | 1.89  | 6.73  | 3.02 | 17.0  | 880  | 9921  | 158  | 5902  | 3134 | 115  | 5.81  |
| 20    | 8.42  | 194  | 10.4 | 22.9  | 5.92 | 47.6  | 32.0  | 14896 | 5.01  | 0.01 | 43.9  | 18.1  | 9.87  | 4.12 | 40.0  | 998  | 18122 | 102  | 4977  | 3256 | 142  | 10.9  |
| 21    | 10.91 | 258  | 13.1 | 33.5  | 5.73 | 40.4  | 23.5  | 12972 | 7.08  | 1.04 | 40.7  | 9.61  | 18.0  | 0.10 | 18.9  | 1367 | 9899  | 55.4 | 3642  | 4292 | 190  | 7.23  |
| 22    | 1.45  | 143  | 5.12 | 15.4  | 4.16 | 16.5  | 12.5  | 6945  | 0.01  | 1.58 | 0.01  | 2.72  | 11.0  | 0.09 | 10.3  | 1163 | 10222 | 172  | 4774  | 2836 | 171  | 5.35  |

S.L.: sampling location; ND: not detected.

**Table S2.** Average of metal concentrations (ppm) and total organic matter (%) in bottom sediment of Lake Qaroun in second year.

| S. L. | OM    | Mn   | Sb   | As    | Cd   | Cr    | Cu    | Fe    | Pb   | Se   | Zn    | Ni   | Co    | Mo   | Li    | Mg   | Al    | Ba   | Zr    | P    | Ga    | Hf    |
|-------|-------|------|------|-------|------|-------|-------|-------|------|------|-------|------|-------|------|-------|------|-------|------|-------|------|-------|-------|
| 1     | 14.53 | 261  | 4.67 | 7.35  | 6.44 | 45.01 | 32.59 | 12332 | 13.0 | ND   | 30.98 | 16.9 | 11.05 | 1.02 | 26.78 | 984  | 20706 | 263  | 11072 | 2591 | 134   | 15.06 |
| 2     | 16.33 | 257  | 6.48 | 6.89  | 6.03 | 44.78 | 31.21 | 11812 | 10.9 | 0.01 | 28.43 | 16.0 | 12.75 | 0.92 | 30.05 | 977  | 20003 | 291  | 10230 | 2504 | 148   | 14.06 |
| 3     | 12.53 | 153  | 7.01 | 13.0  | 5.01 | 35.11 | 22.83 | 8939  | 1.55 | 2.14 | 22.03 | 12.2 | 10.01 | 1.31 | 15.96 | 963  | 15968 | 245  | 12340 | 2510 | 129   | 12.56 |
| 4     | 12.69 | 335  | 7.68 | 4.59  | 5.65 | 37.1  | 36.4  | 11598 | 9.54 | ND   | 39.2  | 22.2 | 14.4  | 1.27 | 26.52 | 975  | 17330 | 165  | 10802 | 2695 | 159   | 12.9  |
| 5     | 12.01 | 787  | 5.84 | 22.3  | 5.31 | 48.6  | 18.1  | 7861  | 6.55 | 0.52 | 13.5  | 11.8 | 12.5  | 1.38 | 18.0  | 929  | 16558 | 286  | 12131 | 2789 | 202   | 10.4  |
| 6     | 4.37  | 568  | 10.3 | 6.65  | 5.67 | 63.3  | 22.0  | 8869  | 4.28 | ND   | 11.0  | 12.8 | 19.7  | 0.70 | 13.1  | 1082 | 13133 | 257  | 12177 | 2777 | 324   | 11.5  |
| 7     | 2.93  | 497  | 5.67 | 10.26 | 4.66 | 20.22 | 13.9  | 5648  | 1.64 | 2.67 | 12.34 | 7.40 | 8.12  | 1.26 | 16.12 | 887  | 10443 | 360  | 5623  | 2909 | 104   | 8.27  |
| 8     | 3.17  | 224  | 7.34 | 27.9  | 5.64 | 21.0  | 11.3  | 5736  | 0.02 | 6.54 | 5.9   | 2.16 | 9.63  | 1.55 | 19.3  | 708  | 9452  | 121  | 7658  | 3394 | 221   | 7.64  |
| 9     | 18.07 | 391  | 6.66 | 5.81  | 7.45 | 63.0  | 52.1  | 16963 | 18.8 | ND   | 60.1  | 28.5 | 17.5  | 2.48 | 29.69 | 1023 | 21856 | 233  | 12486 | 2643 | 208   | 21.1  |
| 10    | 5.85  | 313  | 7.57 | 15.5  | 4.47 | 34.9  | 21.1  | 7324  | 2.75 | 0.07 | 20.0  | 17.5 | 13.4  | 2.69 | 19.2  | 1015 | 10188 | 95.3 | 5557  | 3052 | 166   | 7.82  |
| 11    | 8.53  | 363  | 6.36 | 12.3  | 5.34 | 36.5  | 23.6  | 9859  | 4.67 | ND   | 12.4  | 15.5 | 12.3  | 0.75 | 23.7  | 1157 | 16637 | 237  | 7642  | 3290 | 141   | 10.3  |
| 12    | 2.71  | 371  | 2.87 | 12.9  | 4.86 | 28.3  | 17.1  | 7746  | 8.15 | 3.12 | 11.4  | 12.2 | 9.16  | 0.08 | 22.4  | 1113 | 17259 | 258  | 7135  | 3025 | 104   | 8.81  |
| 13    | 9.96  | 364  | 4.13 | 9.52  | 6.84 | 48.3  | 39.1  | 16237 | 2.73 | ND   | 25.8  | 22.3 | 15.6  | 0.18 | 24.0  | 1123 | 21258 | 281  | 8778  | 2917 | 146   | 15.7  |
| 14    | 3.52  | 269  | 6.78 | 14.6  | 5.15 | 24.5  | 14.7  | 7032  | 5.46 | 0.74 | 4.05  | 7.93 | 8.95  | 1.28 | 23.86 | 1136 | 11657 | 201  | 7321  | 3068 | 112   | 7.81  |
| 15    | 3.63  | 483  | 5.69 | 20.6  | 4.46 | 28.2  | 15.7  | 6294  | 2.15 | 1.02 | 12.2  | 9.50 | 9.12  | 1.24 | 13.4  | 876  | 10583 | 158  | 5795  | 3414 | 107   | 7.27  |
| 16    | 2.11  | 110  | 1.76 | 27.5  | 3.33 | 8.42  | 6.49  | 2319  | 0.02 | 3.75 | 6.88  | 6.20 | 2.93  | 1.54 | 14.1  | 859  | 3124  | 45.6 | 2274  | 3137 | 46.2  | 3.73  |
| 17    | 1.33  | 48.3 | 0.08 | 24.2  | 4.02 | 6.55  | 3.60  | 2134  | ND   | 8.16 | 0.05  | 2.70 | 0.79  | 0.68 | 14.3  | 916  | 6458  | 105  | 4569  | 3004 | 36.3  | 4.18  |
| 18    | 2.72  | 86.3 | 5.23 | 21.0  | 4.98 | 13.1  | 8.12  | 4433  | 4.32 | 4.38 | 0.03  | 2.84 | 3.03  | 0.25 | 19.85 | 1202 | 11964 | 218  | 5902  | 3101 | 50.7  | 6.42  |
| 19    | 0.69  | 106  | 5.07 | 25.9  | 4.53 | 13.8  | 6.60  | 3979  | 0.37 | 5.66 | 0.04  | 2.08 | 4.45  | 1.25 | 15.7  | 971  | 9987  | 176  | 5800  | 3233 | 99.8  | 5.53  |
| 20    | 8.06  | 186  | 9.89 | 24.5  | 6.12 | 49.1  | 31.8  | 14754 | 4.88 | 0.02 | 40.7  | 16.8 | 12.1  | 5.92 | 38.1  | 1037 | 18575 | 93.5 | 4621  | 3327 | 162.6 | 12.7  |
| 21    | 11.04 | 268  | 12.9 | 36.5  | 5.57 | 41.1  | 25.4  | 12539 | 7.86 | 0.91 | 46.0  | 8.14 | 16.7  | 0.16 | 20.9  | 1325 | 9949  | 62.5 | 3747  | 4393 | 200.4 | 9.45  |
| 22    | 1.96  | 169  | 6.38 | 19.3  | 4.86 | 17.2  | 13.0  | 7033  | 0.02 | 1.88 | ND    | 1.44 | 8.95  | 0.14 | 12.9  | 1301 | 9531  | 194  | 4579  | 2978 | 158.2 | 6.58  |

S.L.: sampling location; ND: not detected.
